# Supplementary material
Source: PubMed Central journal article supplement (PMC8640941)
Supplement: pnas.2102178118.sapp.pdf [file pnas.2102178118.sapp.pdf]

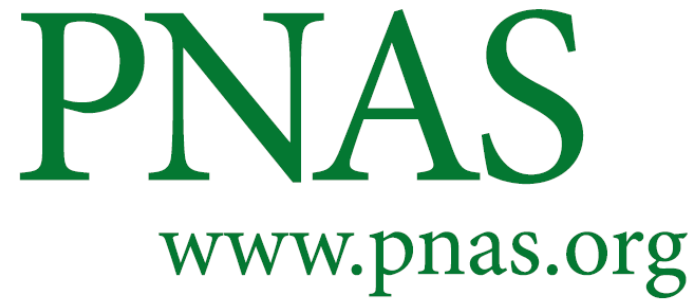

## **Supplementary Information for**

G protein-signaling biased mu opioid receptor agonists that produce sustained G protein activation are noncompetitive agonists

Edward L. Stahl, Cullen L. Schmid, Agnes Acevedo-Canabal, Cai Read, Travis W. Grim, Nicole M. Kennedy, Thomas D. Bannister, Laura M. Bohn\*

The Scripps Research Institute, Department of Molecular Medicine

\*Correspondence: Laura M. Bohn, PhD

Email: [LBohn@scripps.edu](mailto:LBohn@scripps.edu)

### **This PDF file includes:**

Figures S1 to S3

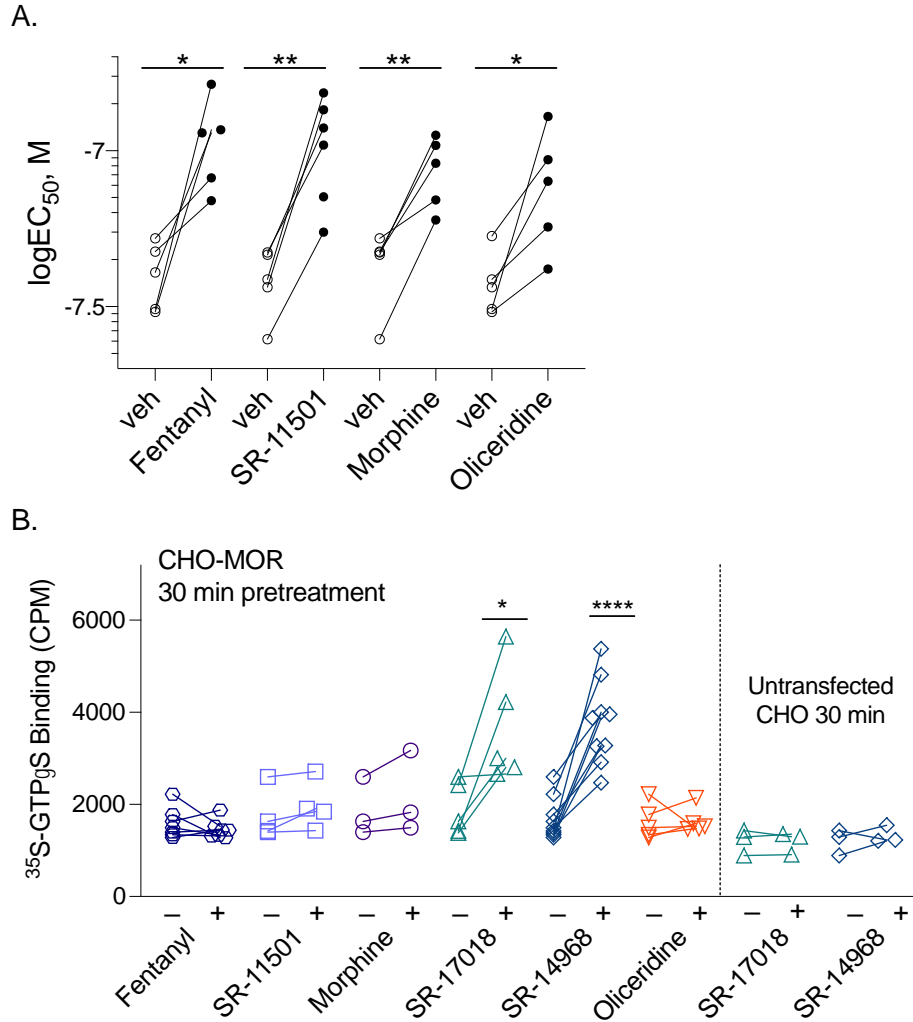

Figure S1.  $^{35}\text{S}$ -GTP $\gamma$ S binding in membranes prepared following 10  $\mu\text{M}$  pretreatment of live CHO-hMOR cells with the indicated agonists. **A**). Comparison of DAMGO potency values following 2 hour pre-treatment. (Accompanies Figure 1, Table 1; paired Student's  $t$  test  $*p < 0.05$ ,  $**p < 0.01$ ). **B**). Changes in baseline after 30 minutes pretreatment of live cells. Untransfected cells are shown for comparison (same treatment conditions).  $*p < 0.05$ ;  $****p < 0.0001$ , paired Student's  $t$ -test. (Accompanies Figure 1).

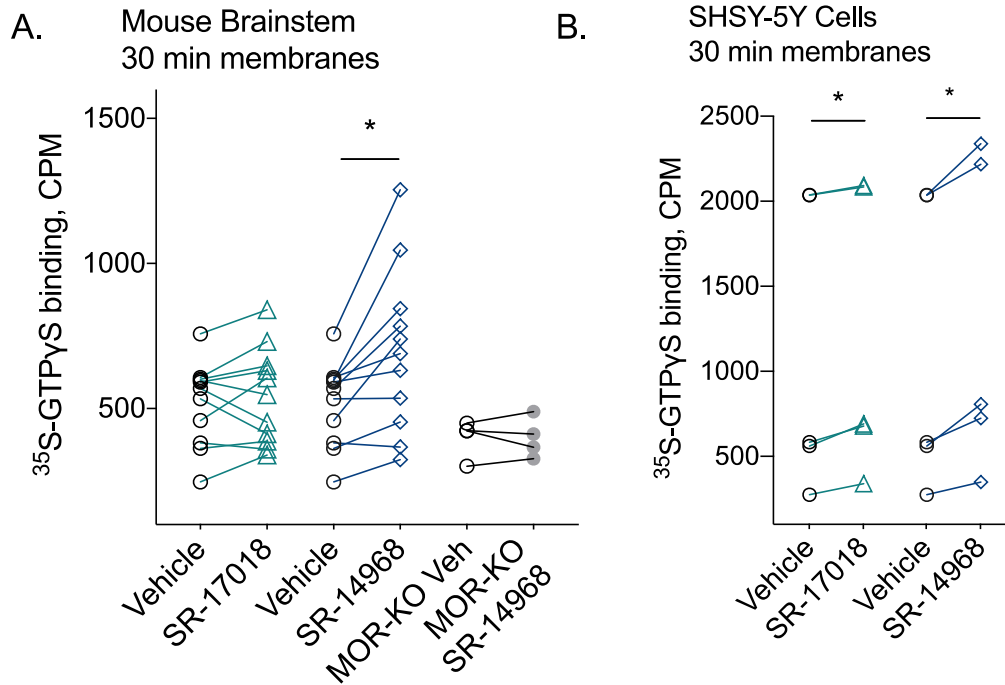

Figure S2.  $^{35}\text{S-GTP}\gamma\text{S}$  baseline binding following SR-17018 or SR14968 (10  $\mu\text{M}$ , 30 min) pretreatment in **A**). mouse brainstem membranes and **B**). SH-SY5Y cell membranes. The normalized means data are presented in Figures 2H and I, respectively. Since the vehicle treated group was matched for each replicate of each drug treatment, a one-way RM-ANOVA followed by a Dunnett's post-hoc test for variance was applied,  $*p < 0.05$ . **A**). No stimulation was observed in the MOR-KO (paired  $t$ -test,  $p > 0.05$ ).

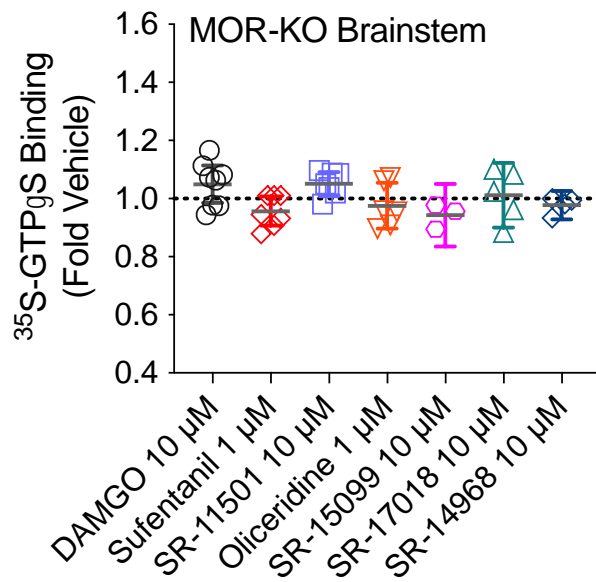

Figure S3. Lack of MOR agonist-stimulated <sup>35</sup>S-GTP<sub>γ</sub>S binding in membranes prepared from MOR-KO mouse brainstem (mean with 95% CI). (Accompanies Figure 4)
